# Supplementary material for: Cancer-Associated Mutations of the Adenosine A2A Receptor Have Diverse Influences on Ligand Binding and Receptor Functions
Source: Molecules. 2022 Jul 22;27(15):4676. doi: 10.3390/molecules27154676 (PMC9331671; doi:10.3390/molecules27154676)
Supplement: Supplementary file 1 [file molecules-27-04676-s001.zip › molecules-1726179-SI.pdf]

**Table S1.** List of cancer-associated A<sub>2A</sub>AR mutations investigated in this study.

| <b>Mutation</b>        | <b>Affected cases<br/>per cancer type<br/>across the GDC</b> | <b>Cancer type</b>                                                              |
|------------------------|--------------------------------------------------------------|---------------------------------------------------------------------------------|
| A15S <sup>1.41</sup>   | 1/987                                                        | Breast invasive carcinoma                                                       |
| F70L <sup>ECL1</sup>   | 1/533                                                        | Uterine Corpus Endometrial Carcinoma                                            |
| I92M <sup>3.40</sup>   | 1/1060                                                       | Lung adenocarcinoma                                                             |
| L95F <sup>3.43</sup>   | 1/1060                                                       | Lung squamous cell carcinoma                                                    |
| S132L <sup>4.53</sup>  | 3/533<br>1/399                                               | Uterine Corpus Endometrial Carcinoma (3 cases)<br>Colon adenocarcinoma (1 case) |
| A165V <sup>ECL2</sup>  | 1/399                                                        | Colon adenocarcinoma                                                            |
| I251T <sup>6.53</sup>  | 1/399                                                        | Colon adenocarcinoma                                                            |
| F257L <sup>6.59</sup>  | 1/533                                                        | Uterine Corpus Endometrial Carcinoma                                            |
| A265S <sup>ECL3</sup>  | 1/987                                                        | Breast invasive carcinoma                                                       |
| A265V <sup>ECL3</sup>  | 1/987                                                        | Breast invasive carcinoma                                                       |
| *A265T <sup>ECL3</sup> | 1/1060                                                       | Lung squamous cell carcinoma                                                    |
| V275A <sup>7.40</sup>  | 1/533                                                        | Uterine Corpus Endometrial Carcinoma                                            |
| H278N <sup>7.43</sup>  | 1/399                                                        | Colon adenocarcinoma                                                            |
| *S281L <sup>7.46</sup> | 1/533<br>1/79                                                | Uterine Corpus Endometrial Carcinoma (1 case)<br>Rectum adenocarcinoma (1 case) |
| P285L <sup>7.50</sup>  | 1/1060                                                       | Lung squamous cell carcinoma                                                    |

Mutations are shown in the numbering of A<sub>2A</sub>AR amino acid sequence as well as the Ballesteros and Weinstein number in superscript.

\* A<sub>2A</sub>AR Mutations that were also identified as natural variants.

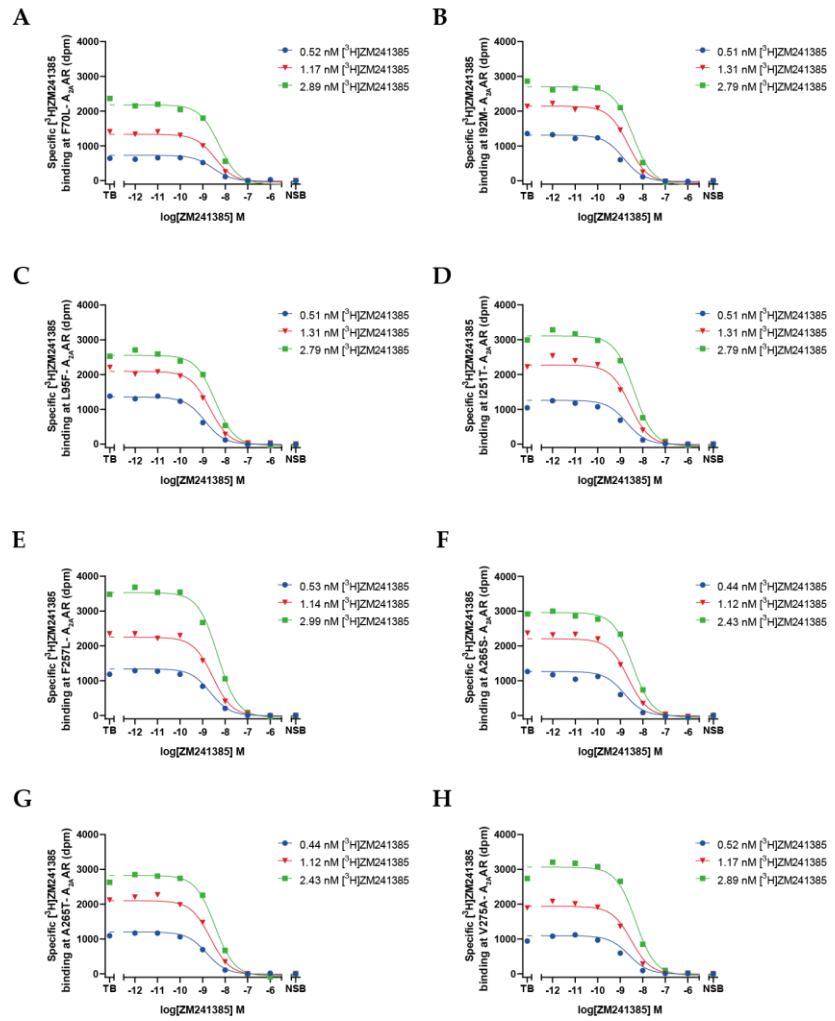

**Figure S1.** Homologous displacement of three concentrations of  $[^3\text{H}]\text{ZM241385}$  by increasing concentrations of ZM241385 at mutant  $\text{A}_{2\text{A}}\text{AR}$ s. Different concentrations of membranes were used dependent on receptor expression levels: (A) F70L- $\text{A}_{2\text{A}}\text{AR}$  (4.5  $\mu\text{g}$ ); (B) I92M- $\text{A}_{2\text{A}}\text{AR}$  (4  $\mu\text{g}$ ); (C) L95F- $\text{A}_{2\text{A}}\text{AR}$  (3  $\mu\text{g}$ ); (D) I251T- $\text{A}_{2\text{A}}\text{AR}$  (3  $\mu\text{g}$ ); (E) F257L- $\text{A}_{2\text{A}}\text{AR}$  (1.5  $\mu\text{g}$ ); (F) A265S- $\text{A}_{2\text{A}}\text{AR}$  (1.5  $\mu\text{g}$ ); (G) A265T- $\text{A}_{2\text{A}}\text{AR}$  (1  $\mu\text{g}$ ); (H) V275A- $\text{A}_{2\text{A}}\text{AR}$  (2  $\mu\text{g}$ ). Representative curves from one experiment performed in duplicate.

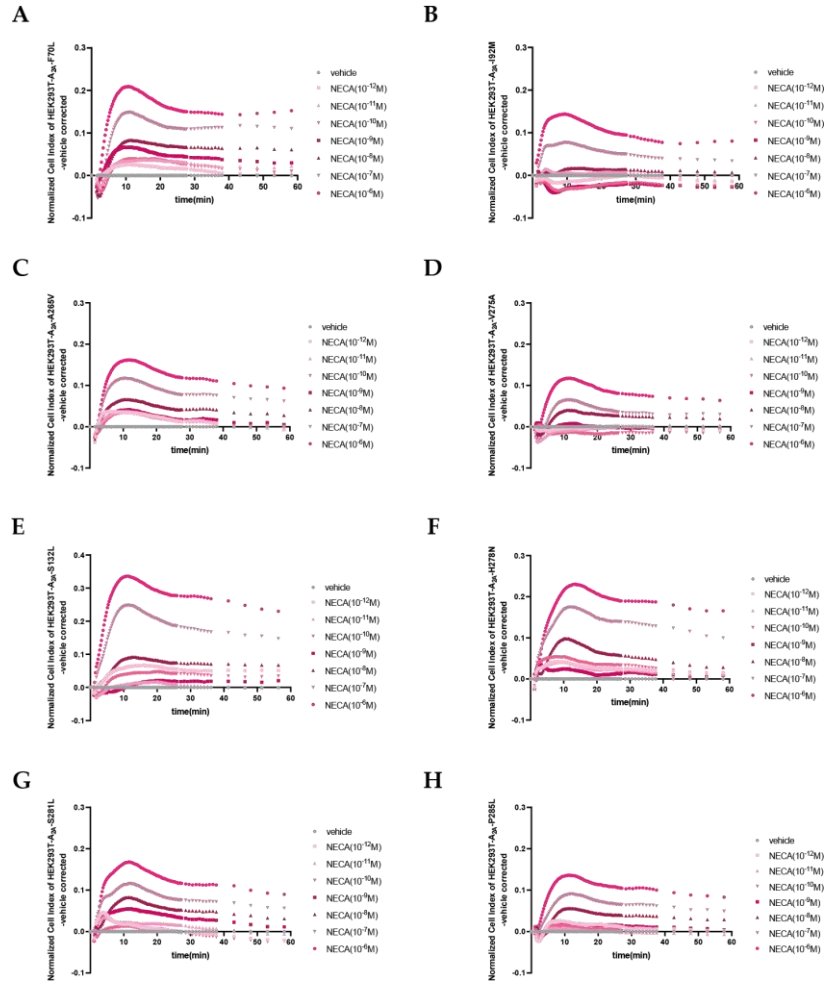

**Figure S2.** Representative graph of vehicle-normalized cell index after stimulation with different concentrations of NECA at the mutant A<sub>2A</sub>ARs in a label-free impedance based cell morphology assay. (A) F70L-A<sub>2A</sub>AR; (B) I92M-A<sub>2A</sub>AR; (C) A265V-A<sub>2A</sub>AR; (D) V275A-A<sub>2A</sub>AR; (E) S132L-A<sub>2A</sub>AR; (F) H278N-A<sub>2A</sub>AR; (G) S281L-A<sub>2A</sub>AR; (H) P285L-A<sub>2A</sub>AR.
